# Supplementary material
Source: PubMed Central journal article supplement (PMC10992245)

# Li's Supplementary Figure 1

## A

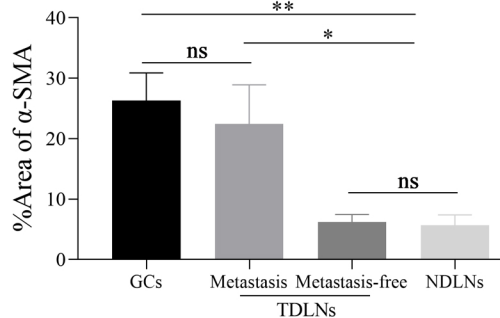

## C

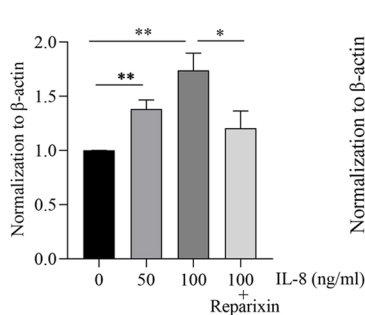

## E

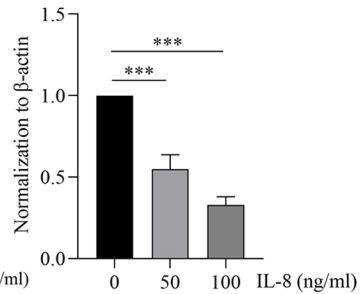

## B

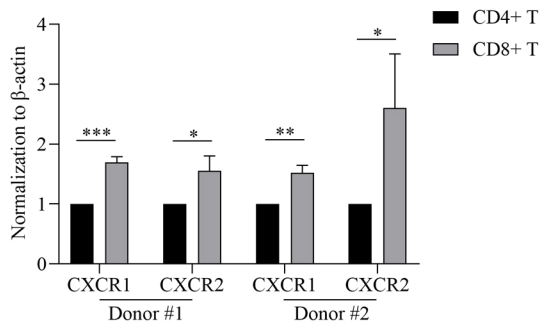

## D

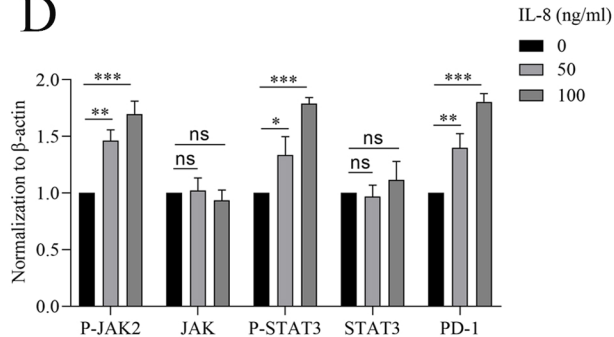

Supplement: 262_2022_3223_MOESM2_ESM.pdf [file 262_2022_3223_MOESM2_ESM.pdf]
